# Supplementary material for: Mo2C microspheres and nanorods as counter electrode catalysts for iodide-free redox couples in dye-sensitized solar cells
Source: Royal Society of Chemistry journal article supplement (doi:10.1039/c6tc01715k), 2016-01-01
Supplement: c6tc01715k1.pdf [file c6tc01715k1.pdf]

## Supplementary Information

### **Mo<sub>2</sub>C microspheres and nanorods as counter electrode catalysts for iodide-free redox couples in dye-sensitized solar cells**

Haikuo Zheng,<sup>‡</sup> Hongyue Guo,<sup>‡</sup> Dong An, Kezhong Wu,\* Chenjing Gao, Qianji Han, Yajing Zhu, Ya-nan Lin and Mingxing Wu\*

Key Laboratory of Inorganic Nano-materials of Hebei Province, College of Chemistry and Material Science, Hebei Normal University, Shijiazhuang, 050024, China. Tel. & Fax: +86-311-80787438, E-mail: mingxing.wu@mail.hebtu.edu.cn

<sup>‡</sup> Haikuo Zheng and Hongyue Guo are co-first authors

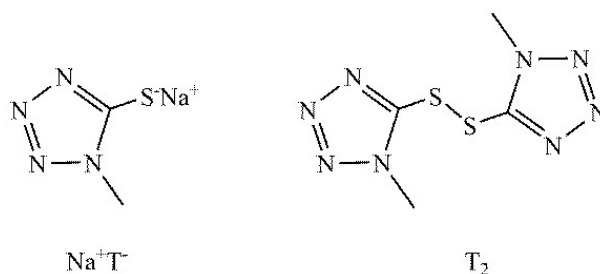

**Fig. S1** Molecular structure of redox couple of T<sub>2</sub>/T<sup>-</sup>

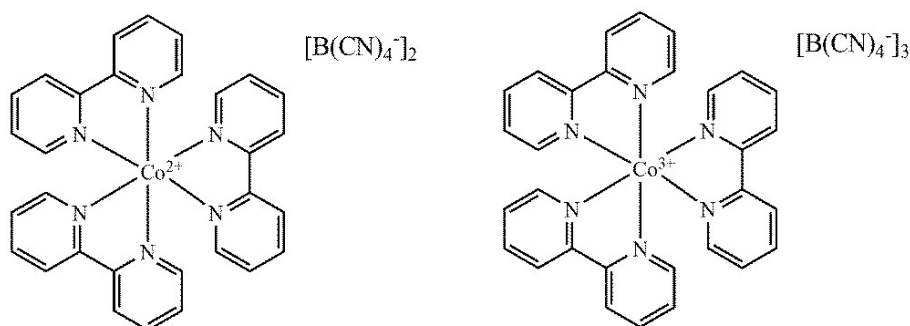

**Fig. S2** Molecular structure of redox couple of Co<sup>3+/2+</sup>

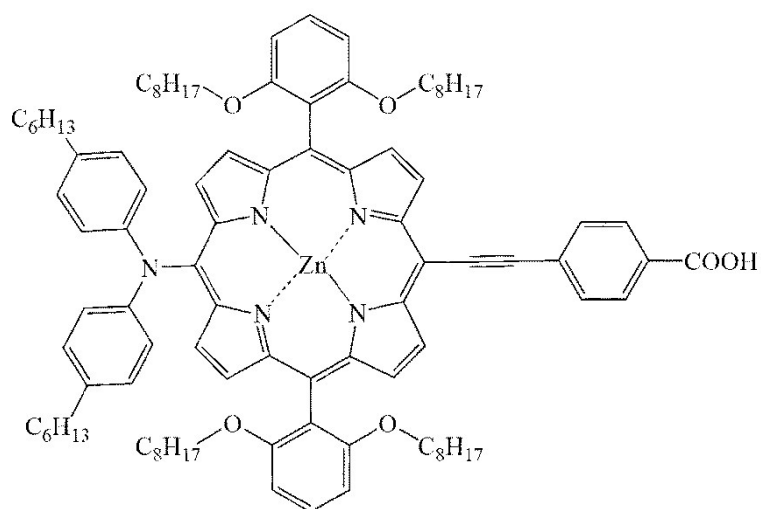

**Fig. S3** Molecular structure of YD2-o-C8 dye.

**Table S1.** Photovoltaic parameters of the  $T_2/T^-$  electrolyte based DSSCs using different CEs.

| CE                   | $V_{oc}/mV$ | $J_{sc}/mA\ cm^{-2}$ | FF   | PCE/% |
|----------------------|-------------|----------------------|------|-------|
| Mo <sub>2</sub> C-Ms | 691         | 12.64                | 0.63 | 5.50  |
| Mo <sub>2</sub> C-Nr | 692         | 11.21                | 0.58 | 4.86  |
| Pt                   | 682         | 12.44                | 0.44 | 3.73  |
